# Supplementary material
Source: PubMed Central journal article supplement (PMC4746603)
Supplement: cr2015148x1.pdf [file cr2015148x1.pdf]

| Generation | Strain              | Mean +/- SD      | Median | p values | # worms | Figure |
|------------|---------------------|------------------|--------|----------|---------|--------|
| 5          | WT                  | 18.257 +/- 0.586 | 18     |          | 53/90   |        |
| 5          | <i>spr-5(by101)</i> | 18.942 +/- 0.578 | 18     | 0.3737   | 63/90   |        |
| 5          | WT                  | 15.718 +/- 0.456 | 15     |          | 85/90   | 1a     |
| 5          | <i>spr-5(by101)</i> | 16.457 +/- 0.458 | 15     | 0.3211   | 84/90   | 1a     |
| 19         | WT                  | 20.704 +/- 0.631 | 22     |          | 67/90   |        |
| 19         | <i>spr-5(by101)</i> | 24.627 +/- 0.750 | 24     | 0.0002   | 56/90   |        |
| 20         | WT                  | 20.612 +/- 0.696 | 20     |          | 72/90   |        |
| 20         | <i>spr-5(by101)</i> | 25.402 +/- 0.770 | 26     | <0.0001  | 53/90   |        |
| 20         | WT                  | 15.703 +/- 0.329 | 15     |          | 68/90   | 1b     |
| 20         | <i>spr-5(by101)</i> | 20.856 +/- 0.747 | 21     | <0.0001  | 56/90   | 1b     |
| 20         | WT                  | 15.505 +/- 0.447 | 17     |          | 86/90   |        |
| 20         | <i>spr-5(by101)</i> | 20.161 +/- 0.564 | 19     | <0.0001  | 77/90   |        |
| 22         | WT                  | 17.217 +/- 0.562 | 18     |          | 53/90   |        |
| 22         | <i>spr-5(by101)</i> | 20.611 +/- 0.640 | 20     | <0.0001  | 65/90   |        |
| 6          | WT                  | 18.246 +/- 0.397 | 18     |          | 87/90   | S1     |
| 6          | <i>spr-5(by134)</i> | 18.821 +/- 0.407 | 18     | 0.4614   | 69/90   | S1     |
| 7          | WT                  | 17.295 +/- 0.394 | 18     |          | 80/90   | S1     |
| 7          | <i>spr-5(by134)</i> | 20.753 +/- 0.612 | 22     | <0.0001  | 66/90   | S1     |
| 8          | WT                  | 18.227 +/- 0.465 | 17     |          | 88/90   | S1     |
| 8          | <i>spr-5(by134)</i> | 19.772 +/- 0.449 | 21     | 0.0545   | 71/90   | S1     |
| 9          | WT                  | 17.590 +/- 0.390 | 18     |          | 80/90   | S1     |
| 9          | <i>spr-5(by134)</i> | 20.971 +/- 0.450 | 20     | <0.0001  | 83/90   | S1     |
| 6          | WT                  | 21.403 +/- 0.454 | 21     |          | 72/90   | S1     |
| 6          | <i>spr-5(by134)</i> | 21.317 +/- 0.489 | 21     | 0.9533   | 66/90   | S1     |
| 7          | WT                  | 20.686 +/- 0.440 | 20     |          | 79/90   | S1     |
| 7          | <i>spr-5(by134)</i> | 20.988 +/- 0.557 | 22     | 0.4310   | 61/90   | S1     |
| 8          | WT                  | 19.624 +/- 0.313 | 20     |          | 84/90   | S1     |
| 8          | <i>spr-5(by134)</i> | 23.758 +/- 0.467 | 25     | <0.0001  | 76/90   | S1     |
| 9          | WT                  | 18.616 +/- 0.369 | 20     |          | 81/90   | S1     |
| 9          | <i>spr-5(by134)</i> | 23.355 +/- 0.415 | 24     | 0.0001   | 73/90   | S1     |

**Supplementary Table 1. *Spr-5(by101)* and *spr-5(by134)* mutant worms have a transgenerational extended longevity** The figure panels in which specific experiments are shown or used are indicated in the right column. The mean lifespan and SD values were calculated by StatView from triplicate samples of 30 worms each (90 worms total). # worms: number of observed dead worms at the end of the experiment/number of alive worms at the beginning of the experiment. The difference between both numbers corresponds to the number of censored worms (worms that underwent “matricide”, exhibited ruptured vulva, or crawled off the plates). P values are calculated by log rank (Mantel-Cox) statistical test.
