# Supplementary material
Source: PubMed Central journal article supplement (PMC4746603)
Supplement: cr2015148x6.pdf [file cr2015148x6.pdf]

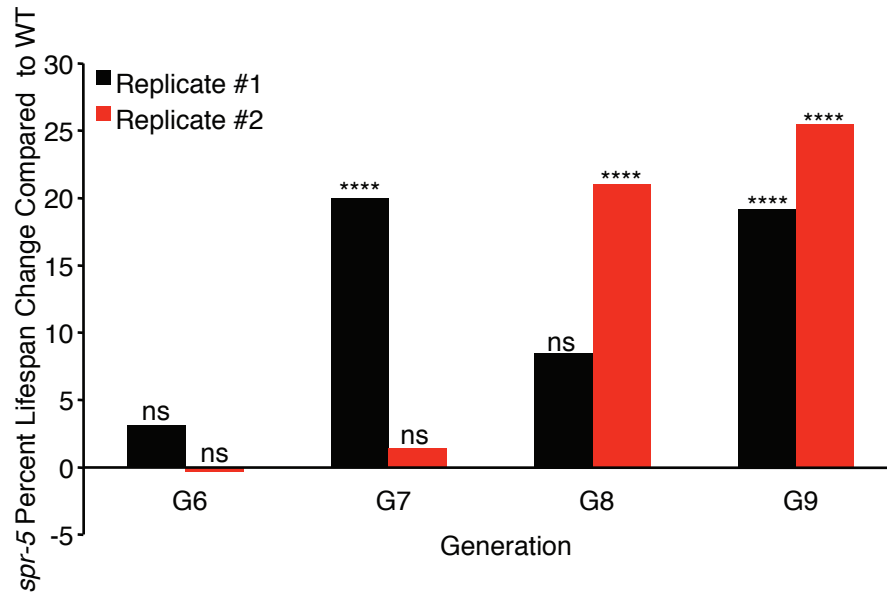

**Figure S1: *spr-5* mutants display extended transgenerational longevity by generation 7 or 8**  
*Spr-5(by134)* mutant worms display a lifespan extension compared to wild type worms by generation 7 or generation 8. Two independent experiments are shown and statistics are presented in Table S1.
