# Supplementary material
Source: PubMed Central journal article supplement (PMC4746603)
Supplement: cr2015148x7.pdf [file cr2015148x7.pdf]

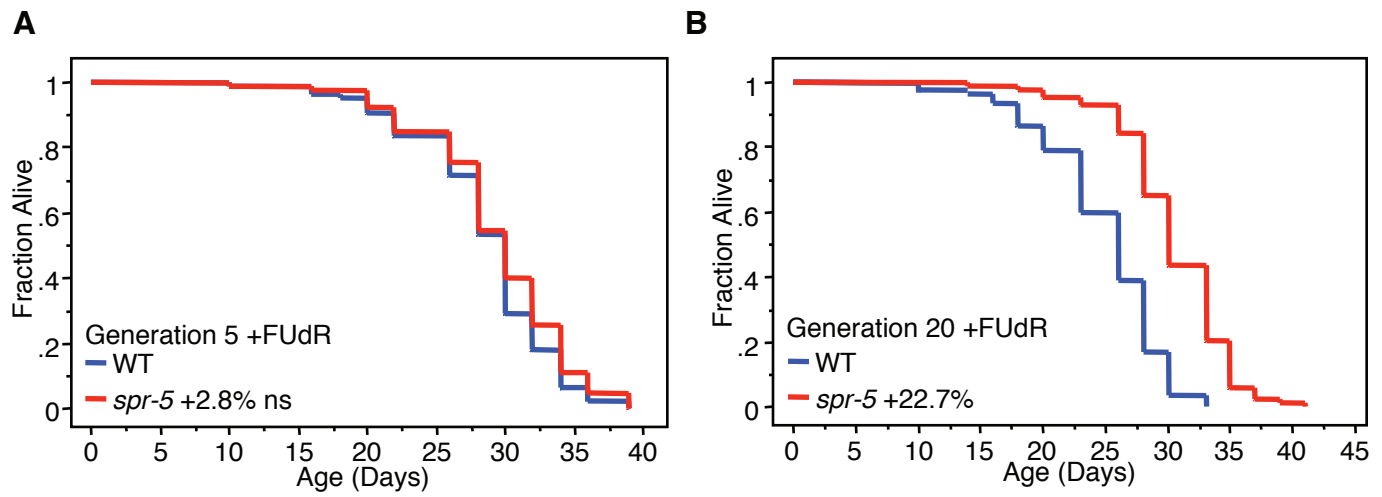

**Figure S2: Extended transgenerational longevity of *spr-5* mutants is independent of reduced egg laying**  
**A)** Early generation (G5) *spr-5(by101)* mutant worms live as long as wild type worms ( $p=0.2515$ ) on FUdR (100 mg/L). Statistics are presented in table S3. **B)** Late generation (G20) *spr-5(by101)* mutant worms live longer than wild type worms ( $p<0.0001$ ) on FUdR (100 mg/L). Statistics are presented in Table S2.
