# Supplementary material
Source: PubMed Central journal article supplement (PMC4746603)
Supplement: cr2015148x8.pdf [file cr2015148x8.pdf]

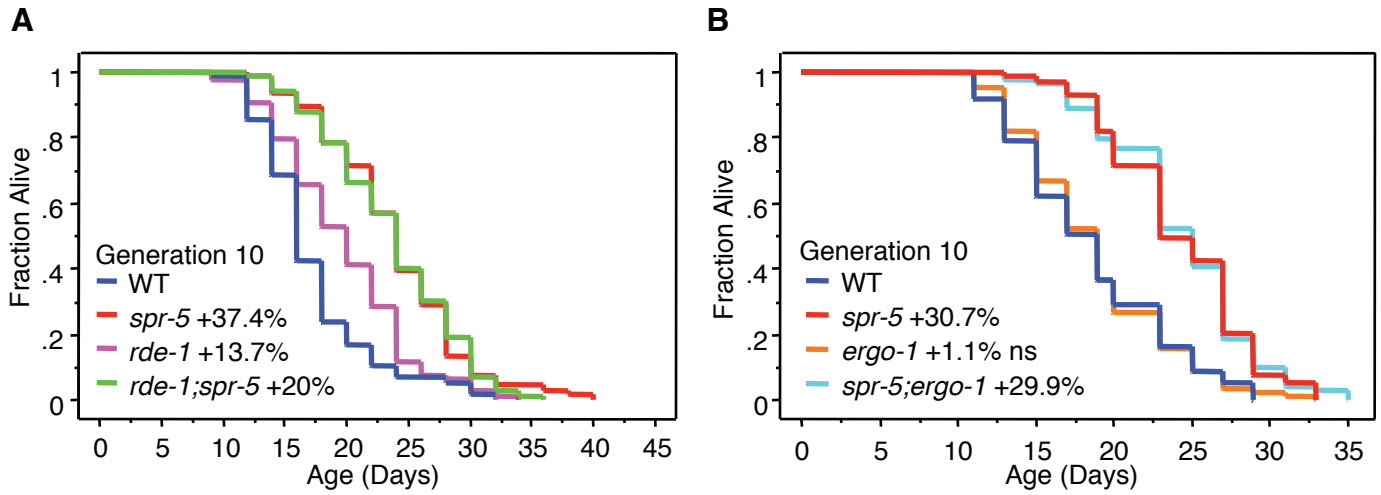

**Figure S3: Extended transgenerational longevity of *spr-5* mutants is independent of *rde-1* and *ergo-1***

**A)** *spr-5;rde-1* double mutant worms live significantly longer than *rde-1(ne219)* mutant worms at generation 10 ( $p < 0.0001$ ). Statistics are presented in Table S3. **B)** *spr-5;ergo-1* double mutant worms live significantly longer than *ergo-1(tm1860)* mutant worms at generation 10 ( $p < 0.0001$ ). Statistics are presented in Table S3.
